# Supplementary material for: Low birthweight in New York city and upstate New York following the events of September 11th
Source: Oxford University Press journal article supplement (doi:10.1093/humrep/dem301), 2007-09-28
Supplement: dem301_Supplementary_Data.zip [file dem301_Supplementary_Data.zip]

Archive with 1 entries (1 files):
- dem301supp.pdf
