# Supplementary material for: Low birthweight in New York city and upstate New York following the events of September 11th
Source: Oxford University Press journal article supplement (doi:10.1093/humrep/dem301), 2007-09-28
Supplement: dem301_Supplementary_Data.zip [file dem301_Supplementary_Data.zip › dem301supp.pdf]

**Supplementary Table I.** Proportion delivering a low birthweight infant (<1,500, 1,500-1,999, and 2,000-2,499 grams) and preterm (<32 completed weeks, 32 to <37 completed weeks) in New York City (NYC, excluding births in lower Manhattan) and in upstate New York in 40-week period after September 11, 2001, and the same 40-week periods from each of two years before.

|                       | NYC     |         | Upstate |         |
|-----------------------|---------|---------|---------|---------|
|                       | n       | (%)     | n       | (%)     |
| <b>Total</b>          | 245,284 | (100.0) | 280,995 | (100.0) |
| <b>Birthweight</b>    |         |         |         |         |
| <1,500                | 3,245   | ( 1.3)  | 2,943   | ( 1.1)  |
| 1,500-1,999           | 2,971   | ( 1.2)  | 2,645   | ( 0.9)  |
| 2,000-2,499           | 10,431  | ( 4.3)  | 9,356   | ( 3.3)  |
| <b>Preterm</b>        |         |         |         |         |
| Known gestational age | 235,381 | (96.0)  | 271,142 | (96.5)  |
| <32 weeks*            | 4,420   | ( 1.9)  | 3,989   | ( 1.5)  |
| 32 to <37 weeks*      | 20,469  | ( 8.7)  | 19,900  | ( 7.3)  |

\* % of known gestational age

**Supplementary Table II.** Demographic characteristics of gravidas residing in New York City (excluding lower Manhattan) and upstate New York in the 40-week period after September 11, 2001, and the same 40-week periods from each of two years before.

|                                 | NYC before<br>n (%) | NYC after<br>n (%) | Upstate before<br>n (%) | Upstate after<br>n (%) |
|---------------------------------|---------------------|--------------------|-------------------------|------------------------|
| <b>Total</b>                    | 164,635 (100)       | 80,649 (100)       | 189,468 (100)           | 91,527 (100)           |
| <b>Infant Sex</b>               |                     |                    |                         |                        |
| Male                            | 84,515 (51)         | 41,343 (51)        | 96,702 (51)             | 46,735 (51)            |
| Female                          | 80,120 (49)         | 39,306 (49)        | 92,766 (49)             | 44,792 (49)            |
| <b>Smoker</b>                   |                     |                    |                         |                        |
| No                              | 159,219 (97)        | 78,528 (97)*       | 163,009 (86)            | 78,942 (86)            |
| Yes                             | 5,416 ( 3)          | 2,121 ( 3)         | 26,459 (14)             | 12,585 (14)            |
| <b>Maternal Race/Ethnicity</b>  |                     |                    |                         |                        |
| Non-Hispanic White              | 43,353 (26)         | 21,166 (26)*       | 142,219 (75)            | 67,644 (74)*           |
| African-American                | 55,100 (33)         | 24,898 (31)        | 20,777 (11)             | 10,115 (11)            |
| Hispanic                        | 47,684 (29)         | 25,090 (31)        | 19,150 (10)             | 9,949 (11)             |
| Asian/Other                     | 18,498 (11)         | 9,495 (12)         | 7,322 ( 4)              | 3,819 ( 4)             |
| <b>Maternal Natality</b>        |                     |                    |                         |                        |
| US Born                         | 76,103 (46)         | 36,432 (45)*       | 158,802 (84)            | 75,574 (83)*           |
| Foreign-born                    | 88,532 (54)         | 44,217 (55)        | 30,666 (16)             | 15,953 (17)            |
| <b>Maternal Age (years)</b>     |                     |                    |                         |                        |
| <18                             | 5,572 ( 3)          | 2,440 ( 3)*        | 5,111 ( 3)              | 2,255 ( 2)*            |
| 18-34                           | 132,001 (80)        | 64,571 (80)        | 149,322 (79)            | 71,716 (78)            |
| >35                             | 27,061 (16)         | 13,638 (17)        | 35,033 (18)             | 17,556 (19)            |
| <b>Maternal Education</b>       |                     |                    |                         |                        |
| <H.S. graduate                  | 40,474 (25)         | 19,818 (25)*       | 27,812 (15)             | 13,990 (15)*           |
| ≥H.S. graduate                  | 121,701 (74)        | 60,426 (75)        | 158,644 (84)            | 76,337 (83)            |
| Unknown                         | 2,460 ( 1)          | 405 ( .5)          | 3,012 ( 2)              | 1,200 ( 1)             |
| <b>Parity</b>                   |                     |                    |                         |                        |
| 1                               | 72,995 (44)         | 36,502 (45)*       | 76,082 (40)             | 36,971 (40)*           |
| 2-5                             | 87,131 (53)         | 41,997 (52)        | 109,945 (58)            | 52,773 (58)            |
| ≥6                              | 4,508 ( 3)          | 2,150 ( 3)         | 3,322 ( 2)              | 1,756 ( 2)             |
| Unknown                         | 1 ( 0)              | 0 ( 0)             | 119 ( 0)                | 27 ( 0)                |
| <b>Hypertensive Disorder</b>    |                     |                    |                         |                        |
| No                              | 156,258 (95)        | 76,507 (95)        | 174,889 (92)            | 84,075 (92)*           |
| Yes                             | 6,228 ( 4)          | 3,018 ( 4)         | 9,264 ( 5)              | 4,321 ( 5)             |
| Unknown                         | 2,149 ( 1)          | 1,124 ( 1)         | 5,315 ( 3)              | 3,131 ( 3)             |
| <b>Payer of delivery</b>        |                     |                    |                         |                        |
| Insurance/HMO                   | 70,572 (43)         | 34,364 (43)*       | 131,787 (70)            | 63,681 (70)*           |
| Medicaid                        | 87,004 (53)         | 43,655 (54)        | 47,392 (25)             | 23,143 (25)            |
| Self pay                        | 5,572 ( 3)          | 2,380 ( 3)         | 3,702 ( 2)              | 2,177 ( 2)             |
| Unknown                         | 1,487 ( 1)          | 250 ( 0)           | 6,587 ( 3)              | 2,526 ( 3)             |
| <b>Prenatal Care Initiation</b> |                     |                    |                         |                        |
| 1st trimester                   | 95,683 (58)         | 52,139 (65)*       | 140,230 (74)            | 66,652 (73)*           |
| >1st/None/Missing               | 68,952 (42)         | 28,510 (35)        | 49,238 (26)             | 24,875 (27)            |

\*  $\chi^2$   $p < 0.05$  before versus after; Differences in percents may not be apparent due to rounding.

H.S. graduate: High School graduate, HMO: health maintenance organization

**Supplementary Table III.** Adjusted\* odds ratios (OR) and 95% confidence intervals (CI) for risk of delivering a preterm infant (<32 completed weeks, 32 to <37 completed weeks) in New York City (excluding births in lower Manhattan) and in upstate New York during the week beginning September 11, 2001 compared to the previous three weeks.

|                                            | N (% preterm) |       | Crude OR | Adjusted* OR (95% CI) |              | p-value |
|--------------------------------------------|---------------|-------|----------|-----------------------|--------------|---------|
| <b>&lt;32 weeks versus ≥37 weeks</b>       |               |       |          |                       |              |         |
| New York City                              | 8,194         | (1.5) | 1.29     | 1.30                  | (0.89, 1.91) | 0.17    |
| Upstate New York                           | 9,366         | (1.4) | 1.12     | 1.09                  | (0.75, 1.60) | 0.65    |
| <b>32 to &lt;37 weeks versus ≥37 weeks</b> |               |       |          |                       |              |         |
| New York City                              | 8,064         | (8.0) | 0.92     | 0.91                  | (0.75, 1.09) | 0.31    |
| Upstate New York                           | 9,230         | (8.5) | 0.98     | 0.98                  | (0.82, 1.17) | 0.82    |

\* Controlling for gender, maternal smoking (yes/no), race/ethnicity (Non-Hispanic White, African American, Hispanic, Asian/Other), education (<high school graduate versus high school graduate or more), country of birth (US versus foreign-born), age (<18, 18-34, 35+ years), parity (1<sup>st</sup>, 2<sup>nd</sup>-5<sup>th</sup>, 6<sup>th</sup> or more), prenatal care initiation (1<sup>st</sup> trimester versus later or none), payer for delivery (private insurance/HMO, Medicaid, self-pay, unknown), and maternal hypertensive disorder during pregnancy.

**Supplementary Table IV.** Estimated coefficients (SEs in parentheses) for ten four-week intervals starting September 11, 2001, from interrupted time series models predicting the ratio of births weighing <1,500 grams, 1,500 to 1,999 grams, and 2,000 to 2,499 grams to those weighing  $\geq$ 2,500 grams in **(a)** New York City† and **(b)** Upstate NY, 1996-2002. The coefficients are those estimated for a binary variable score 1 for the interval starting and ending with the dates shown, and 0 otherwise. The coefficients are the difference between the observed value in the interval and that expected from history (i.e., from the parameters expressing autocorrelation in the series) and from the proportion of the cohort with prenatal care. Positively signed coefficients suggest the observed values were greater than expected, while negatively scored coefficients indicate observed values lower than expected.

| <b>4-Week Interval</b>      | <b>&lt;1,500 grams<br/>Coefficient (SE)</b> | <b>1,500-1,999 grams<br/>Coefficient (SE)</b> | <b>2,000-2,499 grams<br/>Coefficient (SE)</b> |
|-----------------------------|---------------------------------------------|-----------------------------------------------|-----------------------------------------------|
| <b>(a) NYC†</b>             |                                             |                                               |                                               |
| 1. 9/11-10/8                | -0.0010 (0.0011)                            | 0.0004 (0.0010)                               | -0.0033 (0.0029)                              |
| 2. 10/9-11/5                | -0.0020 (0.0012)                            | -0.0003 (0.0010)                              | 0.0016 (0.0029)                               |
| 3. 11/6-12/3                | 0.0015 (0.0012)                             | 0.0008 (0.0010)                               | -0.0026 (0.0029)                              |
| 4. 12/4-12/31               | 0.0031 (0.0012)*                            | -0.00003 (0.0010)                             | 0.0041 (0.0029)                               |
| 5. 1/1-1/28                 | 0.0028 (0.0012)*                            | 0.0011 (0.0010)                               | 0.0039 (0.0029)                               |
| 6. 1/29-2/25                | -0.0016 (0.0012)                            | -0.0016 (0.0010)                              | 0.0031 (0.0029)                               |
| 7. 2/26-3/25                | -0.0019 (0.0012)                            | -0.0008 (0.0010)                              | 0.0024 (0.0029)                               |
| 8. 3/26-4/22                | 0.0024 (0.0012)*                            | -0.0009 (0.0010)                              | 0.0028 (0.0029)                               |
| 9. 4/23-5/20                | 0.0031 (0.0012)**                           | 0.0014 (0.0010)                               | 0.0007 (0.0029)                               |
| 10. 5/21-6/17               | 0.0001 (0.0011)                             | -0.0014 (0.0010)                              | 0.0026 (0.0029)                               |
| <b>(b) Upstate New York</b> |                                             |                                               |                                               |
| 1. 9/11-10/8                | -0.0025 (0.0009)**                          | -0.0008 (0.0010)                              | -0.0062 (0.0020)**                            |
| 2. 10/9-11/5                | 0.0004 (0.0009)                             | 0.0002 (0.0010)                               | -0.0010 (0.0020)                              |
| 3. 11/6-12/3                | 0.0016 (0.0009)                             | 0.0017 (0.0010)                               | -0.0009 (0.0020)                              |
| 4. 12/4-12/31               | 0.0008 (0.0010)                             | -0.0011 (0.0010)                              | 0.0055 (0.0020)**                             |
| 5. 1/1-1/28                 | 0.0048 (0.0010)**                           | 0.0008 (0.0010)                               | 0.0010 (0.0020)                               |
| 6. 1/29-2/25                | 0.0008 (0.0010)                             | -0.0003 (0.0010)                              | 0.0021 (0.0020)                               |
| 7. 2/26-3/25                | 0.0018 (0.0010)                             | -0.0014 (0.0010)                              | 0.0018 (0.0020)                               |
| 8. 3/26-4/22                | -0.0007 (0.0009)                            | -0.0005 (0.0010)                              | 0.0011 (0.0020)                               |
| 9. 4/23-5/20                | 0.0012 (0.0009)                             | 0.0007 (0.0010)                               | -0.0018 (0.0020)                              |
| 10. 5/21-6/17               | 0.0005 (0.0009)                             | 0.0002 (0.0010)                               | 0.0002 (0.0019)                               |

\*  $p < 0.05$  \*\*  $p < 0.01$

† NYC models exclude births from lower Manhattan and adjust for the proportion of women initiating prenatal care in the first trimester in each period.
